# Supplementary material for: Evolutionary Genomics Reveals Lineage-Specific Gene Loss and Rapid Evolution of a Sperm-Specific Ion Channel Complex: CatSpers and CatSperβ
Source: PubMed Central journal article supplement (PMC2572835; doi:10.1371/journal.pone.0003569), 2008-10-30
Supplement: pone.0003569.s002.pdf [file pone.0003569.s002.pdf]

**Table S1. List of CatSper Proteins Used for Analyses**

| Name                                                       | Organism                             | Common Name         | Identifier                         | Database |
|------------------------------------------------------------|--------------------------------------|---------------------|------------------------------------|----------|
| <b>Invertebrates - Cnidarians</b>                          |                                      |                     |                                    |          |
| NveCatS-1                                                  | <i>Nematostella vectensis</i>        | starlet sea anemone | XP_001641973.1                     | GenBank  |
| NveCatS-2                                                  | <i>Nematostella vectensis</i>        | starlet sea anemone | XP_001629309.1                     | GenBank  |
| *NveCatS-3                                                 | <i>Nematostella vectensis</i>        | starlet sea anemone | XP_001629965.1                     | GenBank  |
| *NveCatS-4                                                 | <i>Nematostella vectensis</i>        | starlet sea anemone | XP_001631669.1                     | GenBank  |
| NveCatS-β                                                  | <i>Nematostella vectensis</i>        | starlet sea anemone | EDO49139.1                         | GenBank  |
| <b>Invertebrates – Ctenophora</b>                          |                                      |                     |                                    |          |
| PpiCatS-1                                                  | <i>Pleurobrachia pileus</i>          | sea gooseberry      | CU423497.1 (nt)                    | GenBank  |
| PpiCatS-2                                                  | <i>Pleurobrachia pileus</i>          | sea gooseberry      | CU417395.1 (nt)<br>CU422181.1 (nt) | GenBank  |
| <b>Invertebrates - Echinoderms</b>                         |                                      |                     |                                    |          |
| SpuCatS-1                                                  | <i>Strongylocentrotus purpuratus</i> | Purple Sea Urchin   | NW_001347864.1 (nt)                | GenBank  |
| SpuCatS-2                                                  | <i>Strongylocentrotus purpuratus</i> | Purple Sea Urchin   | XP_001193971.1                     | GenBank  |
| SpuCatS-3                                                  | <i>Strongylocentrotus purpuratus</i> | Purple Sea Urchin   | NW_001320541.1 (nt)                | GenBank  |
| SpuCatS-4                                                  | <i>Strongylocentrotus purpuratus</i> | Purple Sea Urchin   | NW_001312374.1 (nt)                | GenBank  |
| *SpuCatS-β                                                 | <i>Strongylocentrotus purpuratus</i> | Purple Sea Urchin   | NW_001356100.1 (nt)                | GenBank  |
| <b>Invertebrates – Cephalochordates (Amphioxus)</b>        |                                      |                     |                                    |          |
| BflCatS-1                                                  | <i>Branchiostoma floridae</i>        | Florida Lancelet    | scaffold_42 (nt)                   | JGI      |
| BflCatS-2                                                  | <i>Branchiostoma floridae</i>        | Florida Lncelet     | scaffold_346 (nt)                  | JGI      |
| BflCatS-3                                                  | <i>Branchiostoma floridae</i>        | Florida Lancelet    | scaffold_92 (nt)                   | JGI      |
| BflCatS-4                                                  | <i>Branchiostoma floridae</i>        | Florida Lancelet    | scaffold_135 (nt)                  | JGI      |
| *BflCatS-β                                                 | <i>Branchiostoma floridae</i>        | Florida Lancelet    | scaffold_62 (nt)                   | JGI      |
| <b>Invertebrates – Urochodates (Tunicates)</b>             |                                      |                     |                                    |          |
| CsaCatS-1                                                  | <i>Ciona savignyi</i>                | Sea Squirt          | Reftig_44 (nt)                     | Ensembl  |
| CsaCatS-2                                                  | <i>Ciona savignyi</i>                | Sea Squirt          | Reftig_464 (nt)                    | Ensembl  |
| CsaCatS-3                                                  | <i>Ciona savignyi</i>                | Sea Squirt          | Reftig_19 (nt)                     | Ensembl  |
| CsaCatS-4                                                  | <i>Ciona savignyi</i>                | Sea Squirt          | Reftig_17 (nt)                     | Ensembl  |
| *CsaCatS-β                                                 | <i>Ciona savignyi</i>                | Sea Squirt          | Reftig_4 (nt)                      | Ensembl  |
| CinCatS-1                                                  | <i>Ciona intestinalis</i>            | Sea Squirt          | Cioin2: 221463                     | JGI      |
| CinCatS-2                                                  | <i>Ciona intestinalis</i>            | Sea Squirt          | Chunk scaffold_215 (nt)            | JGI      |
| *CinCatS-3                                                 | <i>Ciona intestinalis</i>            | Sea Squirt          | Chunk 2q_165 (nt)                  | JGI      |
| CinCatS-4                                                  | <i>Ciona intestinalis</i>            | Sea Squirt          | Chunk 2q_460 (nt)                  | JGI      |
| CinCatS-β                                                  | <i>Ciona intestinalis</i>            | Sea Squirt          | Chunk 9q_416 (nt)                  | JGI      |
| <b>Vertebrates – Chondrichthyes (Cartilaginous Fishes)</b> |                                      |                     |                                    |          |
| *CmiCatS-2                                                 | <i>Callorhynchus milii</i>           | Elephant Shark      | AAVX01047343.1 (nt)                | GenBank  |
| *CmiCatS-3                                                 | <i>Callorhynchus milii</i>           | Elephant Shark      | AAVX01241861.1 (nt)                | GenBank  |
| *CmiCatS-4                                                 | <i>Callorhynchus milii</i>           | Elephant Shark      | AAVX01198782.1 (nt)                | GenBank  |
|                                                            |                                      |                     | AAVX01295261.1 (nt)                |          |
|                                                            |                                      |                     | AAVX01583470.1 (nt)                |          |
|                                                            |                                      |                     | AAVX01099504.1 (nt)                |          |
| *CmiCatS-β                                                 | <i>Callorhynchus milii</i>           | Elephant Shark      | AAVX01468406.1 (nt)                | GenBank  |
|                                                            |                                      |                     | AAVX01191566.1 (nt)                |          |
|                                                            |                                      |                     | AAVX01360901.1 (nt)                |          |
|                                                            |                                      |                     | AAVX01416650.1 (nt)                |          |
| *LerCatS-2                                                 | <i>Leucoraja erinacea</i>            | Little Skate        | CO050315.1 (nt)                    | GenBank  |
| <b>Vertebrates – Reptiles</b>                              |                                      |                     |                                    |          |
| AcaCatS-1                                                  | <i>Anolis carolinensis</i>           | Anole Lizard        | GENSCAN00000056132                 | Ensembl  |
| AcaCatS-2                                                  | <i>Anolis carolinensis</i>           | Anole Lizard        | GENSCAN00000067675                 | Ensembl  |
| *AcaCatS-3                                                 | <i>Anolis carolinensis</i>           | Anole Lizard        | GENSCAN00000120241                 | Ensembl  |
| *AcaCatS-4                                                 | <i>Anolis carolinensis</i>           | Anole Lizard        | GENSCAN00000121458                 | Ensembl  |
| AcaCatS-β                                                  | <i>Anolis carolinensis</i>           | Anole Lizard        | GENSCAN00000081873                 | Ensembl  |
| <b>Vertebrates – Mammals</b>                               |                                      |                     |                                    |          |
| MusCatS-1                                                  | <i>Mus musculus</i>                  | House Mouse         | NP_647462.1                        | GenBank  |

|            |                                 |                           |                     |         |
|------------|---------------------------------|---------------------------|---------------------|---------|
| MusCatS-2  | <i>Mus musculus</i>             | House Mouse               | NP_694715.2         | GenBank |
| MusCatS-3  | <i>Mus musculus</i>             | House Mouse               | Q80W99.2            | GenBank |
| MusCatS-4  | <i>Mus musculus</i>             | House Mouse               | NP_808534.1         | GenBank |
| MusCatS-β  | <i>Mus musculus</i>             | House Mouse               | NP_766611.1         | GenBank |
| RnoCatS-1  | <i>Rattus norvegicus</i>        | Norway rat                | XP_001070492.1      | GenBank |
| RnoCatS-2  | <i>Rattus norvegicus</i>        | Norway rat                | NP_001012220.1      | GenBank |
| RnoCatS-3  | <i>Rattus norvegicus</i>        | Norway rat                | NP_001099571.1      | GenBank |
| RnoCatS-4  | <i>Rattus norvegicus</i>        | Norway rat                | XP_001066739.1      | GenBank |
| RnoCatS-β  | <i>Rattus norvegicus</i>        | Norway rat                | XP_001065501.1      | GenBank |
| MdoCatS-1  | <i>Monodelphis domestica</i>    | Gray Short-tailed Opossum | XP_001379458.1      | GenBank |
| MdoCatS-2  | <i>Monodelphis domestica</i>    | Gray Short-tailed Opossum | NW_001581835.1 (nt) | GenBank |
| MdoCatS-3  | <i>Monodelphis domestica</i>    | Gray Short-tailed Opossum | XP_001375484.1      | GenBank |
| MdoCatS-4  | <i>Monodelphis domestica</i>    | Gray Short-tailed Opossum | XP_001369666.1      | GenBank |
| MdoCatS-β  | <i>Monodelphis domestica</i>    | Gray Short-tailed Opossum | XP_001369855.1      | GenBank |
| OanCatS-1  | <i>Ornithorhynchus anatinus</i> | Platypus                  | NW_001630702.1 (nt) | GenBank |
| OanCatS-2  | <i>Ornithorhynchus anatinus</i> | Platypus                  | XP_001521786.1      | GenBank |
| OanCatS-3  | <i>Ornithorhynchus anatinus</i> | Platypus                  | NW_001748254.1 (nt) | GenBank |
| OanCatS-4  | <i>Ornithorhynchus anatinus</i> | Platypus                  | XP_001518227.1      | GenBank |
| OanCatS-β  | <i>Ornithorhynchus anatinus</i> | Platypus                  | XP_001514501.1      | GenBank |
| EcaCatS-1  | <i>Equus caballus</i>           | Horse                     | XP_001491183.1      | GenBank |
| EcaCatS-2  | <i>Equus caballus</i>           | Horse                     | NW_001799682.1 (nt) | GenBank |
| EcaCatS-3  | <i>Equus caballus</i>           | Horse                     | XP_001502783.1      | GenBank |
| EcaCatS-4  | <i>Equus caballus</i>           | Horse                     | NW_001799705.1      | GenBank |
| EcaCatS-β  | <i>Equus caballus</i>           | Horse                     | XP_001494623.1      | GenBank |
| BtaCatS-1  | <i>Bos taurus</i>               | Cattle                    | XP_601857.3         | GenBank |
| BtaCatS-2  | <i>Bos taurus</i>               | Cattle                    | XP_595874.3         | GenBank |
| BtaCatS-3  | <i>Bos taurus</i>               | Cattle                    | XP_613302.2         | GenBank |
| BtaCatS-4  | <i>Bos taurus</i>               | Cattle                    | XP_599038.3         | GenBank |
| BtaCatS-β  | <i>Bos taurus</i>               | Cattle                    | NW_001494053.1 (nt) | GenBank |
| CfaCatS-1  | <i>Canis familiaris</i>         | Dog                       | XP_533225.2         | GenBank |
| CfaCatS-2  | <i>Canis familiaris</i>         | Dog                       | XP_851279.1         | GenBank |
| CfaCatS-3  | <i>Canis familiaris</i>         | Dog                       | XP_538633.2         | GenBank |
| CfaCatS-4  | <i>Canis familiaris</i>         | Dog                       | XP_544484.2         | GenBank |
| CfaCatS-β  | <i>Canis familiaris</i>         | Dog                       | XP_848876.1         | GenBank |
| *ScrCatS-4 | <i>Sus scrofa</i>               | Pig                       | CAQ34765.1          | GenBank |
| CpoCatS-β  | <i>Cavia porcellus</i>          | Guinea Pig                | AAKN02025631.1 (nt) | GenBank |

#### Vertebrates – Mammals (Primates)

|            |                               |                            |                     |         |
|------------|-------------------------------|----------------------------|---------------------|---------|
| MmuCatS-1  | <i>Macaca mulatta</i>         | Rhesus Monkey              | XP_001118063.1      | GenBank |
| MmuCatS-2  | <i>Macaca mulatta</i>         | Rhesus Monkey              | XP_001108563.1      | GenBank |
| MmuCatS-3  | <i>Macaca mulatta</i>         | Rhesus Monkey              | XP_001103397.1      | GenBank |
| MmuCatS-4  | <i>Macaca mulatta</i>         | Rhesus Monkey              | XP_001108634.1      | GenBank |
| *MmuCatS-β | <i>Macaca mulatta</i>         | Rhesus Monkey              | BAE00646.1          | GenBank |
| PtrCatS-1  | <i>Pan troglodytes</i>        | Chimpanzee                 | NW_001222291.1 (nt) | GenBank |
| PtrCatS-2  | <i>Pan troglodytes</i>        | Chimpanzee                 | XP_001159071.1      | GenBank |
| PtrCatS-3  | <i>Pan troglodytes</i>        | Chimpanzee                 | XP_527015.2         | GenBank |
| PtrCatS-4  | <i>Pan troglodytes</i>        | Chimpanzee                 | XP_001139244.1      | GenBank |
| PtrCatS-β  | <i>Pan troglodytes</i>        | Chimpanzee                 | XP_001144834.1      | GenBank |
| HsaCatS-1  | <i>Homo sapiens</i>           | Human                      | NP_444282.2         | GenBank |
| HsaCatS-2  | <i>Homo sapiens</i>           | Human                      | Q96P56.2            | GenBank |
| HsaCatS-3  | <i>Homo sapiens</i>           | Human                      | NP_821138.1         | GenBank |
| HsaCatS-4  | <i>Homo sapiens</i>           | Human                      | NP_937770.1         | GenBank |
| HsaCatS-β  | <i>Homo sapiens</i>           | Human                      | NP_079040.2         | GenBank |
| *AgeCatS-1 | <i>Ateles geoffroyi</i>       | Black-handed Spider Monkey | AAQ95774.1          | GenBank |
| *AtrCatS-1 | <i>Aotus trivirgatus</i>      | Douroucouli                | AAQ95776.1          | GenBank |
| *CaeCatS-1 | <i>Cercopithecus aethiops</i> | African Green Monkey       | AAQ95780.1          | GenBank |

|            |                             |                           |                |         |
|------------|-----------------------------|---------------------------|----------------|---------|
| *CguCatS-1 | <i>Colobus guereza</i>      | Guereza                   | AAQ95782.1     | GenBank |
| *GgoCatS-1 | <i>Gorilla gorilla</i>      | Western Gorilla           | AAQ95786.1     | GenBank |
| *LcaCatS-1 | <i>Lemur catta</i>          | Ring-tailed lemur         | AAQ95788.1     | GenBank |
| *LlaCatS-1 | <i>Lagothrix lagotricha</i> | Common Woolly Monkey      | AAQ95773.1     | GenBank |
| *MtaCatS-1 | <i>Miopithecus talapoin</i> | talapoin                  | AAQ95778.1     | GenBank |
| *PhaCatS-1 | <i>Papio hamadryas</i>      | Hamadryas Baboon          | AAQ95781.1     | GenBank |
| *PpaCatS-1 | <i>Pan paniscus</i>         | Pygmy Chimpanzee          | AAQ95784.1     | GenBank |
| *PpyCatS-1 | <i>Pongo pygmaeus</i>       | Bornean Orangutan         | AAQ95787.1     | GenBank |
| *SoeCatS-1 | <i>Saguinus oedipus</i>     | Cotton-top Tamarin        | AAQ95775.1     | GenBank |
| *SscCatS-1 | <i>Saimiri sciureus</i>     | Common Squirrel Monkey    | AAQ95777.1     | GenBank |
| CjaCatS-2  | <i>Callithrix jacchus</i>   | white-tufted-ear marmoset | ABY84144.1     | GenBank |
| *MfaCatS-2 | <i>Macaca fascicularis</i>  | Crab-eating Macaque       | BAE01081.1     | GenBank |
| PanCatS-2  | <i>Papio anubis</i>         | Olive Baboon              | ABY40813.1     | GenBank |
| *MfaCatS-3 | <i>Macaca fascicularis</i>  | Crab-eating Macaque       | XP_001118991.1 | GenBank |

NOTE — Naming of sequences: we describe all CatSper and CatSper- $\beta$  proteins in this study using an abbreviation of genus and species name, followed by names after their phylogenetic relationship with characterized human counterparts. Abbreviations: *nt*, nucleotides.

Database: GenBank, National Center for Biotechnology Information, <http://www.ncbi.nlm.nih.gov/Genbank/>; Ensembl, <http://www.ensembl.org/>; JGI, Joint Genome Institute, <http://www.jgi.doe.gov/>.

\*Sequences that failed in the chi-square test in Tree-Puzzle or contained more than 15% gaps in the refined alignments.
