# Supplementary material for: Evolutionary Genomics Reveals Lineage-Specific Gene Loss and Rapid Evolution of a Sperm-Specific Ion Channel Complex: CatSpers and CatSperβ
Source: PubMed Central journal article supplement (PMC2572835; doi:10.1371/journal.pone.0003569), 2008-10-30
Supplement: pone.0003569.s003.pdf [file pone.0003569.s003.pdf]

Table S2. Genome Synteny – CatSper- $\beta$

| Genes    | <i>RPS6KA5</i> | <i>C14orf159</i> | <i>GPR68</i> | <i>CCDC88C</i> | <i>SMEK1</i> | <i>CatSper-<math>\beta</math></i> | <i>TC2N</i> | <i>FBLN5</i> | <i>TRIP11</i> | <i>ATXN3</i> | <i>NDUFBI</i> |
|----------|----------------|------------------|--------------|----------------|--------------|-----------------------------------|-------------|--------------|---------------|--------------|---------------|
| HsaCh14  | +              | +                | +            | +              | +            | +                                 | +           | +            | +             | +            | +             |
| MusChr12 | +              | +                | +            | +              | +            | +                                 | +           | +            | +             | +            | +             |
| GgaCh5   | +              | +                | +            | +              | +            | -<br>(fragment)                   | +           | +            | +             | +            | +             |

*RPS6KA5*, ribosomal protein S6 kinase, 90kDa, polypeptide 5

*C14orf159*, chromosome 14 open reading frame 159;

*GPR68*, G protein-coupled receptor 68

*CCDC88C*, coiled-coil domain containing 88C;

*SMEK1*, SMEK homolog 1, suppressor of mek1 (Dictyostelium);

*TC2N*, tandem C2 domains, nuclear;

*FBLN5*, fibulin 5;

*TRIP11*, thyroid hormone receptor interactor 11

*ATXN3*, ataxin 3;

*NDUFBI*, NADH dehydrogenase (ubiquinone) 1 beta subcomplex, 1, 7kDa;

Hsa, *H. sapiens*; Mus, *M. musculus*; Gga, *G. gallus*;

Ch - chromosome

(?) – Not mapped to chromosomes.
