# Supplementary material for: Evolutionary Genomics Reveals Lineage-Specific Gene Loss and Rapid Evolution of a Sperm-Specific Ion Channel Complex: CatSpers and CatSperβ
Source: PubMed Central journal article supplement (PMC2572835; doi:10.1371/journal.pone.0003569), 2008-10-30
Supplement: pone.0003569.s004.pdf [file pone.0003569.s004.pdf]

Table S3. Genome Synteny – CatSper-1

No obvious synteny between human and mouse chromosomal regions containing CatSper1 and the chicken genome

| Genes   | <i>TSGA10IP</i> | <i>SART1</i> | <i>EIF1AD</i> | <i>BANF1</i> | <i>CST6</i> | <i>CatSper1</i> | <i>LOC100131232</i> | <i>GAL3ST3</i> | <i>SF3B2</i> | <i>PACSI</i> | <i>KLC2</i> |
|---------|-----------------|--------------|---------------|--------------|-------------|-----------------|---------------------|----------------|--------------|--------------|-------------|
| HsaCh11 | +               | +            | +             | +            | +           | +               | +                   | +              | +            | +            | +           |
| MusCh9  | +               | +            | +             | +            | +           | +               | +                   | +              | +            | +            | +           |
| GgaCh   | -               | (?)          | -             | (?)          | -           | -               | -                   | -              | -            | +            | +           |
|         |                 |              |               |              |             |                 |                     |                |              | Ch3          | Ch3         |

*TSGA10IP*, testis specific, 10 interacting protein;  
*SART1*, squamous cell carcinoma antigen recognized by T cells;  
*EIF1AD*, eukaryotic translation initiation factor 1A domain containing;  
*BANF1*, barrier to autointegration factor 1;  
*CST6*, cystatin E/M;

*LOC100131232*, hypothetical LOC100131232;  
*GAL3ST3*, galactose-3-O-sulfotransferase 3;  
*SF3B2*, splicing factor 3b, subunit 2, 145kDa;  
*PACSI*, phosphofurin acidic cluster sorting protein 1;  
*KLC2*, kinesin light chain 2;

Hsa, *H. sapiens*; Mus, *M. musculus*; Gga, *G. gallus*;  
 Ch - chromosome.
