# Supplementary material for: Evolutionary Genomics Reveals Lineage-Specific Gene Loss and Rapid Evolution of a Sperm-Specific Ion Channel Complex: CatSpers and CatSperβ
Source: PubMed Central journal article supplement (PMC2572835; doi:10.1371/journal.pone.0003569), 2008-10-30
Supplement: pone.0003569.s005.pdf [file pone.0003569.s005.pdf]

Table S4. Genome Synteny – CatSper-2

| Genes   | <i>TUBGCP4</i> | <i>TP53BP1</i> | <i>MAP1A</i> | <i>HISPPD2A</i> | <i>CKMT1B</i> | <i>STRC</i> | <i>CatSper-2</i> | <i>HISPPD2B</i>                | <i>CKMT1A</i> | <i>STRCP</i> | <i>CATSPER2P1</i> | <i>PDIA3</i> | <i>ELL3</i> | <i>SERF2</i> | <i>SERINC4</i> |
|---------|----------------|----------------|--------------|-----------------|---------------|-------------|------------------|--------------------------------|---------------|--------------|-------------------|--------------|-------------|--------------|----------------|
| HsaCh15 | +              | +              | +            | +               | +             | +           | +                | +                              | +             | +            | +                 | +            | +           | +            | +              |
|         |                |                |              |                 |               |             |                  | (primate-specific duplication) |               |              |                   |              |             |              |                |
| MusCh2  | +              | +              | +            | +               | +             | +           | +                |                                |               |              |                   | +            | +           | +            | +              |
| GgaCh10 | +              | +              | +            | +               | +             | -           | -                |                                |               |              |                   | +            |             | +            | +              |
|         |                |                |              |                 |               |             | (fragment)       |                                |               |              |                   |              |             |              |                |

*TUBGCP4*, tubulin, gamma complex associated protein 4;  
*TP53BP1*, tumor protein p53 binding protein 1;  
*MAP1A*, microtubule-associated protein 1A;  
*HISPPD2A*, histidine acid phosphatase domain containing 2B (*pseudogene*);  
*CKMT1B*, creatine kinase, mitochondrial 1B;  
*STRC*, stereocilin;

*HISPPD2B*, histidine acid phosphatase domain containing 2B (*pseudogene*);  
*CKMT1A*, creatine kinase, mitochondrial 1A;  
*STRCP*, stereocilin pseudogene;  
*CATSPER2P1*, cation channel, sperm associated 2 (*pseudogene*);  
*PDIA3*, protein disulfide isomerase family A, member 3;  
*ELL3*, elongation factor RNA polymerase II-like 3;  
*SERF2*, small EDRK-rich factor 2;  
*SERINC4*, serine incorporator 4;

Hsa, *H. sapiens*; Mus, *M. musculus*; Gga, *G. gallus*;  
Ch – chromosome.
