# Supplementary material for: Evolutionary Genomics Reveals Lineage-Specific Gene Loss and Rapid Evolution of a Sperm-Specific Ion Channel Complex: CatSpers and CatSperβ
Source: PubMed Central journal article supplement (PMC2572835; doi:10.1371/journal.pone.0003569), 2008-10-30
Supplement: pone.0003569.s006.pdf [file pone.0003569.s006.pdf]

Table S5. Genome Synteny – CatSper-3

| Genes   | <i>LOC153328</i> | <i>CXCL14</i> | <i>NEUROG1</i> | <i>H2AFY</i> | <i>PITX1</i> | <i>CatSper3</i> | <i>PCBD2</i> | <i>TXNDC15</i> | <i>C5orf24</i> | <i>DDX46</i> | <i>CAMLG</i> |
|---------|------------------|---------------|----------------|--------------|--------------|-----------------|--------------|----------------|----------------|--------------|--------------|
| HsaCh5  | +                | +             | +              | +            | +            | +               | +            | +              | +              | +            | +            |
| MusCh13 | +                | +             | +              | +            | +            | +               | +            | +              | +              | +            | +            |
| GgaCh13 | +                | +             | +              | +            | +            | -<br>(fragment) | +            | +              | +              | +            | +            |

*LOC153328*, LOC153328 similar to CG4995 gene product;  
*CXCL14*, chemokine (C-X-C motif) ligand 14;  
*NEUROG1*, neurogenin 1;  
*H2AFY*, H2A histone family, member Y;  
*PITX1*, paired-like homeodomain transcription factor 1;

*PCBD2*, pterin-4 alpha-carbinolamine dehydratase/dimerization cofactor of hepatocyte nuclear factor 1 alpha (TCF1) 2;  
*TXNDC15*, thioredoxin domain containing 15;  
*C5orf24*, chromosome 5 open reading frame 24;  
*DDX46*, DEAD (Asp-Glu-Ala-Asp) box polypeptide 46;  
*CAMLG*, calcium modulating ligand;

Hsa, *H. sapiens*; Mus, *M. musculus*; Gga, *G. gallus*;  
 Ch – chromosome.
