# Supplementary material for: Evolutionary Genomics Reveals Lineage-Specific Gene Loss and Rapid Evolution of a Sperm-Specific Ion Channel Complex: CatSpers and CatSperβ
Source: PLoS One. 2008 Oct 30;3(10):e3569. doi: 10.1371/journal.pone.0003569 (PMC2572835; doi:10.1371/journal.pone.0003569)
Supplement: Table S6 — Genome Synteny - CatSper4 (0.06 MB PDF) [file pone.0003569.s007.pdf]

Table S6. Genome Synteny – CatSper-4

| Genes   | <i>TRIM63</i> | <i>PDIK1L</i> | <i>GRRP1</i> | <i>ZNF593</i> | <i>CNKSR1</i> | <b><i>CATSPER4</i></b> | <i>EG665186</i> | <i>Ccdc21</i> | <i>Sh3bgrl3</i> | <i>Ubx5</i> | <i>Aim11</i> |
|---------|---------------|---------------|--------------|---------------|---------------|------------------------|-----------------|---------------|-----------------|-------------|--------------|
| HsaCh1  | +             | +             | +            | +             | +             | +                      | +               | +             | +               | +           | +            |
| MusCh4  | +             | +             | +            | +             | +             | +                      | +               | +             | +               | +           | +            |
| GgaCh23 | +             | +             | +            | +             | +             | -                      | -               | +             | +               | +           | +            |

TRIM63, tripartite motif-containing 63;  
PDIK1L, PDLIM1 interacting kinase 1 like;  
GRRP1, glycine/arginine rich protein 1;  
ZNF593, zinc finger protein 593;  
CNKSR1, connector enhancer of kinase suppressor of Ras 1;

EG665186, predicted gene, EG665186;  
Ccdc21, coiled-coil domain containing 21;  
Sh3bgrl3, SH3 domain binding glutamic acid-rich protein-like 3;  
Ubx5, UBX domain containing 5;  
Aim11, absent in melanoma 1-like;

Hsa, *H. sapiens*; Mus, *M. musculus*; Gga, *G. gallus*;  
Ch – chromosome.
