# Supplementary material for: Evolutionary Genomics Reveals Lineage-Specific Gene Loss and Rapid Evolution of a Sperm-Specific Ion Channel Complex: CatSpers and CatSperβ
Source: PLoS One. 2008 Oct 30;3(10):e3569. doi: 10.1371/journal.pone.0003569 (PMC2572835; doi:10.1371/journal.pone.0003569)
Supplement: Table S7 — (0.03 MB PDF) [file pone.0003569.s008.pdf]

Table S7

**Materials and methods***Functional divergence and functional distance analyses*

Site-specific evolutionary rates after gene duplication (type I functional divergence) may differ in the protein family, possibly due to altered functional constraints [1]. Maximum likelihood estimate for  $\theta$ , the coefficient of type I functional divergence, was measured with the program DIVERGE (version 2.0) [2]. A *de novo* neighbor-joining tree was constructed with Poisson distance and re-rooted. Four clusters of the phylogenetic tree, each corresponding to one of the four CatSper groups, were then selected for likelihood ratio tests analysis.

After the coefficient of type I functional divergence for each pair of clusters was calculated, the functional branch length for each cluster,  $b_F$ , was estimated to indicate the degree of altered functional constraints [2]. The value of  $b_F$  is related to the evolutionary rates of duplicated genes compared with the ancestral gene.  $b_F = 0$  suggests the site-specific evolutionary rates of the duplicated gene nearly identical to those of the ancestral gene.

Table S2. Functional divergence between CatSper protein subfamilies

| * $\theta$ | CatS-2            | CatS-3            | CatS-4            |
|------------|-------------------|-------------------|-------------------|
| CatS-1     | $0.525 \pm 0.129$ | $0.433 \pm 0.116$ | $0.483 \pm 0.146$ |
| CatS-2     | \                 | $0.408 \pm 0.076$ | $0.536 \pm 0.116$ |
| CatS-3     | \                 | \                 | $0.336 \pm 0.092$ |

\* $\theta$  - Coefficients of type I functional divergence, all  $p < 0.05$ .

**References:**

- [1] X. Gu, Maximum-likelihood approach for gene family evolution under functional divergence, *Mol. Biol. Evol.* 18 (2001) 453-64.
- [2] X. Gu, K. Vander Velden, DIVERGE: phylogeny-based analysis for functional-structural divergence of a protein family, *Bioinformatics* 18 (2002) 500-1.
